# Supplementary material
Source: MDPI journal article supplement (https://www.mdpi.com/2300-7575/23/2/7)
Supplement: s1 [file s1]

Archive with 1 entries (1 files):
- limnolrev-2567470-supplementary.pdf
