# Supplementary material
Source: MDPI journal article supplement (https://www.mdpi.com/2300-7575/23/2/7)
Supplement: s1 [file s1 › limnolrev-2567470-supplementary.pdf]

| CLASS                    | COLOR                                       | TEXTURE         | SHAPE                | EXAMPLE OF IMAGE                                                                                                                                                         |
|--------------------------|---------------------------------------------|-----------------|----------------------|--------------------------------------------------------------------------------------------------------------------------------------------------------------------------|
| Buildings/<br>households | Pinkish<br>Brown<br>Light gray<br>Dark grey | Rough           | Regular              | 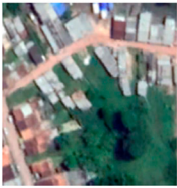 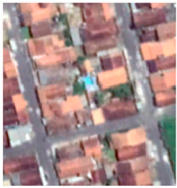   |
| Vegetation               | Dark green<br>Light green<br>Pinkish        | Rough<br>Smooth | Irregular            | 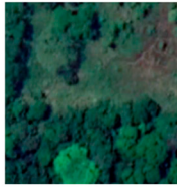 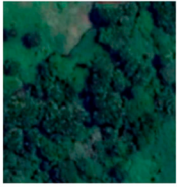   |
| Commercial<br>building   | Grey<br>Pinkish                             | Rough           | Regular<br>Irregular | 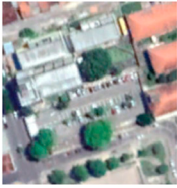 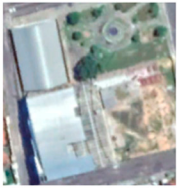   |
| Watercourses             | Black<br>Dark green                         | Smooth          | Regular<br>Irregular | 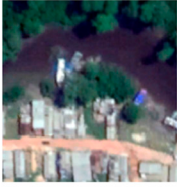 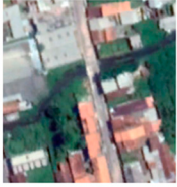 |

Figure S1. Interpretation key for the evaluation of the basin of the Cereja River.

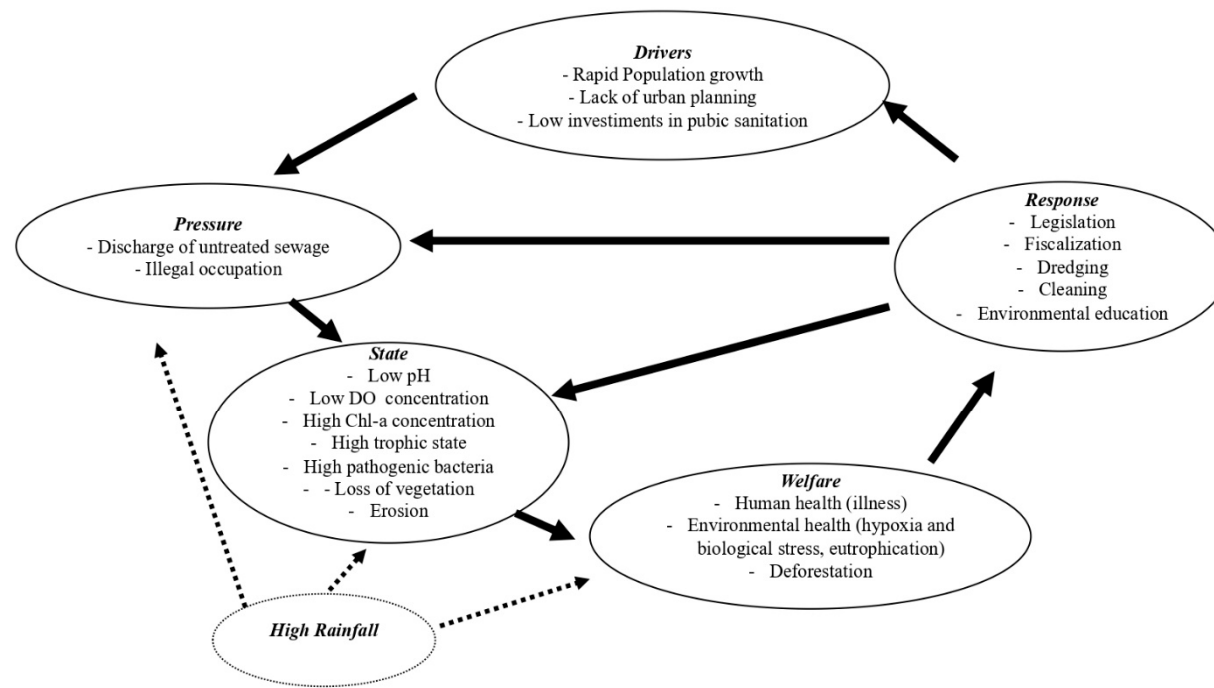

Figure S2. Summary of the DPSWR management model for the Cereja River.

Table S1. Localization of the sample stations.

| Sample Station | Location   | Coordinates (S) | Coordinates (W) |
|----------------|------------|-----------------|-----------------|
| P1             | Vila Nova  | 01°03'521"S     | 46°47'227"W     |
| P2             | Vila Sinhá | 01°03'327"S     | 46°46'581"W     |
| P3             | Taira      | 01°03'148"S     | 46°46'185"W     |
| P4             | Padre Luiz | 01°03'560"S     | 46°45'586"W     |
| P5             | Aldeia     | 01° 03'23"S     | 46° 45'480"W    |
| P6             | Aldeia     | 01° 03'551"S    | 46° 45'423"W    |

Table S2. Types of freshwater use, according to Brazilian National Environment Council (CONAMA).

| CLASSES       | TYPES OF USE                                                                                                                                                                                                                                                                                                                                                                                                                                   |
|---------------|------------------------------------------------------------------------------------------------------------------------------------------------------------------------------------------------------------------------------------------------------------------------------------------------------------------------------------------------------------------------------------------------------------------------------------------------|
| Special class | Water that can be used for (a) human consumption following disinfection; b) the preservation of the natural balance of aquatic communities; and (c) the preservation of aquatic environments in strictly-protected conservation units.                                                                                                                                                                                                         |
| Class 1       | Water that can be used for (a) human consumption, after simple treatment; (b) the protection of aquatic communities; (c) recreational activities involving primary contact, such as swimming, water skiing, and diving (CONAMA resolution 274/2000); (d) irrigation of fruit and vegetables that are consumed raw without removing the skin or harvested close to the soil, and (e) the protection of aquatic communities on indigenous lands. |
| Class 2       | Water that can be used for (a) human consumption, after conventional treatment; (b) the protection of aquatic communities; (c) recreational activities involving primary contact, such as swimming, water skiing, and diving (CONAMA resolution 274/2000); (d) the irrigation of vegetables, fruit, and parks, gardens, and sports fields, with which the public may come into direct contact, and (e) aquaculture and fisheries.              |
| Class 3       | Water that can be used for (a) human consumption, after conventional or advanced treatment; (b) the irrigation of tree, cereal, and forage crops; (c) amateur angling; (d) recreational activities with secondary contact, and (e) the watering of animals.                                                                                                                                                                                    |
| Class 4       | Water that can be used for (a) navigation, and b) landscaping.                                                                                                                                                                                                                                                                                                                                                                                 |

Table S3. Percentage of limits of hydrological variables, considering national resolution and international classification.

| VARIABLES        | LIMITS                                                       | SAMPLES (%) |
|------------------|--------------------------------------------------------------|-------------|
| pH               | <sup>a</sup> 60-90 (ideal Class 1, 2, 3, 4)                  | 88%         |
| Turbidity        | <sup>a</sup> Up to 40 NTU observed (ideal, Class 1)          | 98%         |
|                  | <sup>a</sup> Up to 100 NTU observed (ideal, Class 2, 3)      | 98%         |
| Dissolved Oxygen | <sup>a</sup> More than 6 mg L <sup>-1</sup> (ideal, Class 1) | 0%          |
|                  | <sup>a</sup> More than 5 mg L <sup>-1</sup> (ideal, Class 2) | 17%         |
|                  | <sup>a</sup> More than 4 mg L <sup>-1</sup> (ideal, Class 3) | 43%         |
|                  | <sup>a</sup> More than 2 mg L <sup>-1</sup> (ideal, Class 4) | 79%         |
|                  | <sup>b</sup> Anoxia 0 mg L <sup>-1</sup>                     | 0%          |
|                  | <sup>b</sup> Hypoxia >0 < 2 mg L <sup>-1</sup>               | 21%         |
|                  | <sup>b</sup> Biol Stress > 2 < 5 mg L <sup>-1</sup>          | 60%         |
|                  | <sup>b</sup> > 5 mgL <sup>-1</sup> (ideal)                   | 17%         |
| Chlorophyll-a    | <sup>a</sup> Up to 10 mg m <sup>-3</sup> (ideal, Class 1)    | 57%         |
|                  | <sup>a</sup> Up to 30 mg m <sup>-3</sup> (ideal, Class 2)    | 98%         |
|                  | <sup>a</sup> Up to 60 mg m <sup>-3</sup> (ideal, Class 3)    | 100%        |
|                  | <sup>b</sup> Hypereutrophic > 60 mg m <sup>-3</sup>          | 0%          |
|                  | <sup>b</sup> High > 20, < 60 mg m <sup>-3</sup>              | 12%         |
|                  | <sup>b</sup> Medium > 5, < 20 mg m <sup>-3</sup>             | 74%         |
|                  | <sup>b</sup> Low > 0 and 5 mg m <sup>-3</sup>                | 14%         |
| TSI              | <sup>c</sup> Ultra-oligotrophic ≤ 47                         | 0%          |
|                  | <sup>c</sup> Oligotrophic 47≤IET≤52                          | 2%          |
|                  | <sup>c</sup> Mesotrophic 52≤IET≤59                           | 10%         |
|                  | <sup>c</sup> Eutrophic 59≤IET≤63                             | 19%         |
|                  | <sup>c</sup> Super-eutrophic 63≤IET≤67                       | 26%         |
|                  | <sup>c</sup> Hyperthrophic > 67                              | 43%         |

[37,38]<sup>a</sup>, [39]<sup>b</sup>, [35]<sup>c</sup>.

Table S4. Temporal and spatial *Enterococcus* sp and thermotolerant coliform data in Cereja River.

| Points/         |   | <i>Enterococcus</i> sp (MPN 100 mL <sup>-1</sup> ) <sup>1</sup> and<br>Thermotolerant coliforms (MPN 100 mL <sup>-1</sup> ) <sup>2</sup> |        |        |        |        |        |        |
|-----------------|---|------------------------------------------------------------------------------------------------------------------------------------------|--------|--------|--------|--------|--------|--------|
| Neighborhood    |   | Nov13                                                                                                                                    | Apr14  | Aug14  | Jun18  | Nov18  | Apr19  | Jul19  |
| P1 – Vila Nova  | 1 | -                                                                                                                                        | -      | -      | 12     | 2      | 101    | 0      |
|                 | 2 | 240                                                                                                                                      | 93     | 36     | >1,100 | 75     | 1,100  | 1,100  |
| P2 – Vila Sinhá | 1 | -                                                                                                                                        | -      | -      | 207    | 146    | 258    | 153    |
|                 | 2 | >1,100                                                                                                                                   | 1,100  | >1,100 | >1,100 | >1,100 | >1,100 | >1,100 |
| P3 – Taíra      | 1 | -                                                                                                                                        | -      | -      | 261    | 161    | 369    | 213    |
|                 | 2 | >1,100                                                                                                                                   | >1,100 | >1,100 | >1,100 | >1,100 | >1,100 | >1,100 |
| P4 – Padre Luiz | 1 | -                                                                                                                                        | -      | -      | 371    | 541    | 541    | 235    |
|                 | 2 | >1,100                                                                                                                                   | >1,100 | >1,100 | >1,100 | >1,100 | >1,100 | >1,100 |
| P5 – Aldeia     | 1 | -                                                                                                                                        | -      | -      | 501    | 541    | 541    | 250    |
|                 | 2 | >1,100                                                                                                                                   | >1,100 | 1,100  | >1,100 | >1,100 | >1,100 | >1,100 |
| P6 – Aldeia     | 1 | -                                                                                                                                        | -      | -      | 541    | 486    | 541    | 270    |
|                 | 2 | >1,100                                                                                                                                   | 1,100  | 1,100  | >1,100 | >1,100 | >1,100 | >1,100 |

Table S5. Limits of thermotolerant coliforms and *Enterococcus* sp per type of uses and the unappropriated samples (%), according to national and international classification.

| Use types and limits                          |                                                                                                               | Samples (%)      |
|-----------------------------------------------|---------------------------------------------------------------------------------------------------------------|------------------|
| Thermotolerant coliforms (CONAMA resolutions) |                                                                                                               |                  |
| Class 1                                       | Recreation of primary contact (CONAMA resolution 274/2000)*                                                   | 90.5%            |
|                                               | For the other uses, a limit of 200 MPN 100 mL <sup>-1</sup> (CONAMA resolution 357/2005) **                   | (Unappropriated) |
|                                               |                                                                                                               | 92.9%            |
| Class 2                                       | Recreation of primary contact [(CONAMA resolution 274/2000)*                                                  | 90.5%            |
|                                               | For the other uses, a limit of 1000 MPN 100 mL <sup>-1</sup> (CONAMA resolution 357/2005)**                   | (Unappropriated) |
|                                               |                                                                                                               | 90.5%            |
| Class 3                                       | Recreation of secondary contact, a limit of 2500 MPN 100 mL <sup>-1</sup> (CONAMA resolution 357/2005) **     | (Unappropriated) |
|                                               |                                                                                                               | 90.5%            |
|                                               | For the watering of confined animals, a limit of 1000 MPN 100 mL <sup>-1</sup> (CONAMA resolution 357/2005)** | (Unappropriated) |
|                                               | For the other uses, a limit of 4000 MPN 100 mL <sup>-1</sup> (CONAMA resolution 357/2005)**                   | ***              |
| <i>Enterococcus</i> sp [47]                   |                                                                                                               | Samples (%)      |
| Bathing                                       | Recreation contact, a limit of 33 MPN 100 mL <sup>-1</sup>                                                    | 93.0%            |
|                                               |                                                                                                               | (Unappropriated) |

\*More than 80% of the samples with a maximal number of fecal coliforms per 100 mL: 250 (Excellent), 500 (Very Good), 1000 (Satisfactory) Unappropriated: More than 20% of the samples with a maximal number of 1000 fecal coliforms per 100 mL

\*\*Should not be exceeded in 80% or more, from at least 6 samples collected during the period of one year

\*\*\*Our values reached > 1100 MNP 100 mL<sup>-1</sup>

Table S6. Number of inhabitants, growth rate, effluents and thermotolerant coliform levels within the Cereja River PPA.

| Neighborhoods   | Nº of inhabitants |       | Growth rate (%) | Effluents (m³ day <sup>-1</sup> ) |      | Thermotolerant coliforms NMP 100 mL <sup>-1</sup> (x10 <sup>4</sup> ) |      |      |      |     |
|-----------------|-------------------|-------|-----------------|-----------------------------------|------|-----------------------------------------------------------------------|------|------|------|-----|
|                 | 2012              | 2019  |                 | 2012-2019                         | 2012 | 2019                                                                  | 2012 |      | 2019 |     |
|                 |                   |       |                 |                                   |      |                                                                       | Min  | Max  | Min  | max |
| Vila Nova (P1)  | 52                | 112   | 54%             | 7.7                               | 16.8 | 0.05                                                                  | 0.21 | 0.11 | 0.45 |     |
| Vila Sinhá (P2) | 60                | 95    | 37%             | 9.0                               | 14.2 | 0.06                                                                  | 0.24 | 0.09 | 0.38 |     |
| Taíra (P3)      | 129               | 172   | 25%             | 19.4                              | 25.8 | 0.13                                                                  | 0.52 | 0.17 | 0.69 |     |
| Padre Luís (P4) | 348               | 404   | 14%             | 52.2                              | 60.6 | 0.35                                                                  | 1.39 | 0.4  | 1.62 |     |
| Aldeia (P5, P6) | 237               | 237   | 0%              | 35.5                              | 35.5 | 0.24                                                                  | 0.95 | 0.24 | 0.95 |     |
| Alegre          | 56                | 86    | 35%             | 8.4                               | 12.9 | 0.06                                                                  | 0.22 | 0.09 | 0.34 |     |
| Centro          | 60                | 65    | 8%              | 9.0                               | 9.7  | 0.06                                                                  | 0.24 | 0.06 | 0.26 |     |
| Cereja          | 181               | 198   | 9%              | 27.1                              | 29.7 | 0.18                                                                  | 0.72 | 0.2  | 0.79 |     |
| Total           | 1,123             | 1,369 | 18%             | 168                               | 205  | 1.12                                                                  | 4.49 | 1.37 | 5.47 |     |

Table S7. Land cover area in PPA of Cereja River in 2012 and 2019.

| Land cover        | PPA area (km <sup>2</sup> )<br>in 2012 | Total area (%)<br>PPA in 2012 | PPA area (km <sup>2</sup> )<br>in 2019 | Total area (%) PPA<br>in 2019 |
|-------------------|----------------------------------------|-------------------------------|----------------------------------------|-------------------------------|
| Vegetation        | 0.37                                   | 61.3%                         | 0.34                                   | 57.4%                         |
| Building and road | 0.07                                   | 12.2%                         | 0.10                                   | 17.2%                         |
| Other covers      | 0.16                                   | 26.5%                         | 0.15                                   | 25.5%                         |
| Total area        | 0.60                                   | 100.0%                        | 0.60                                   | 100.0%                        |
